# Supplementary material
Source: PubMed Central journal article supplement (PMC2426726)

# Supplementary Figure 1

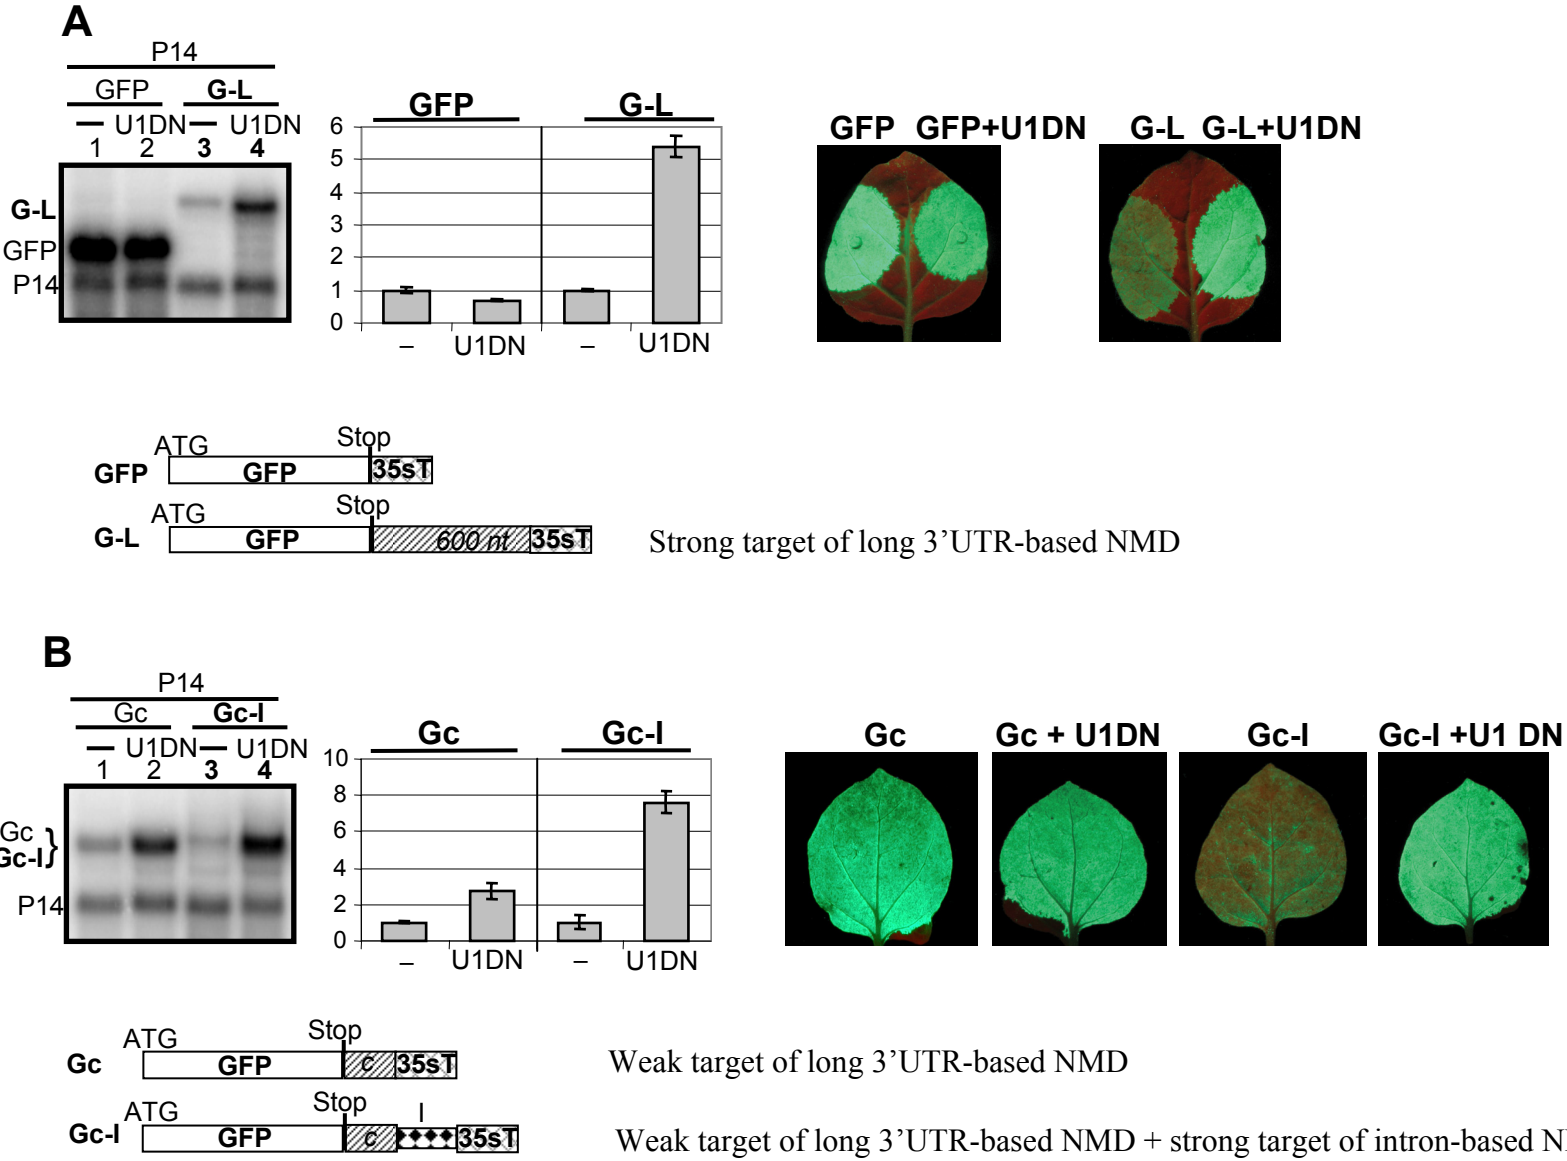

# Supplementary Figure 2

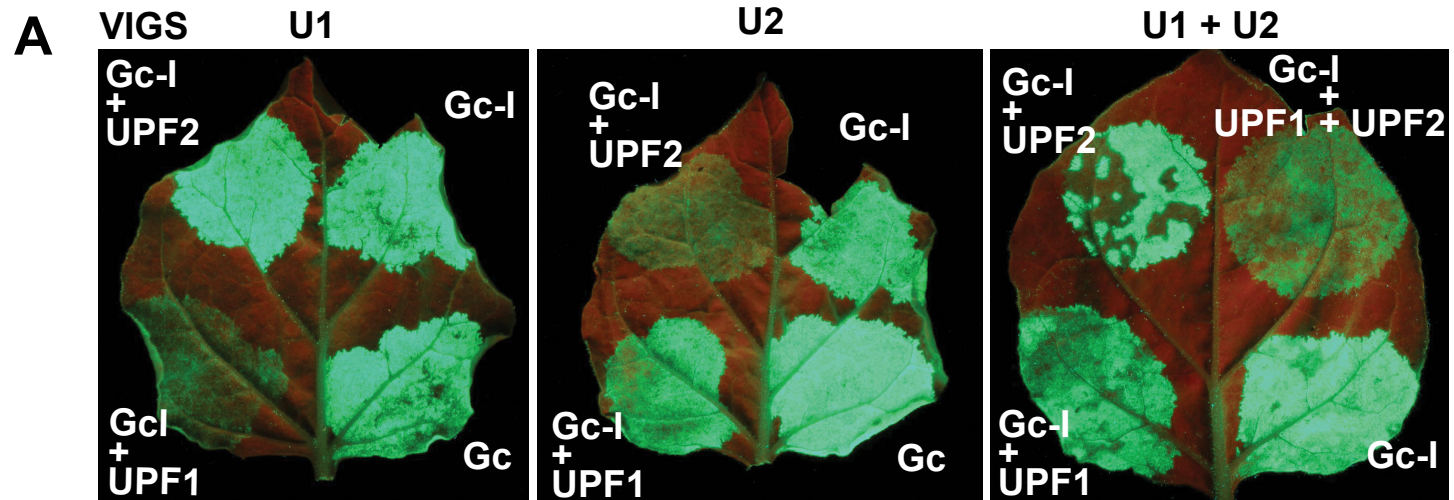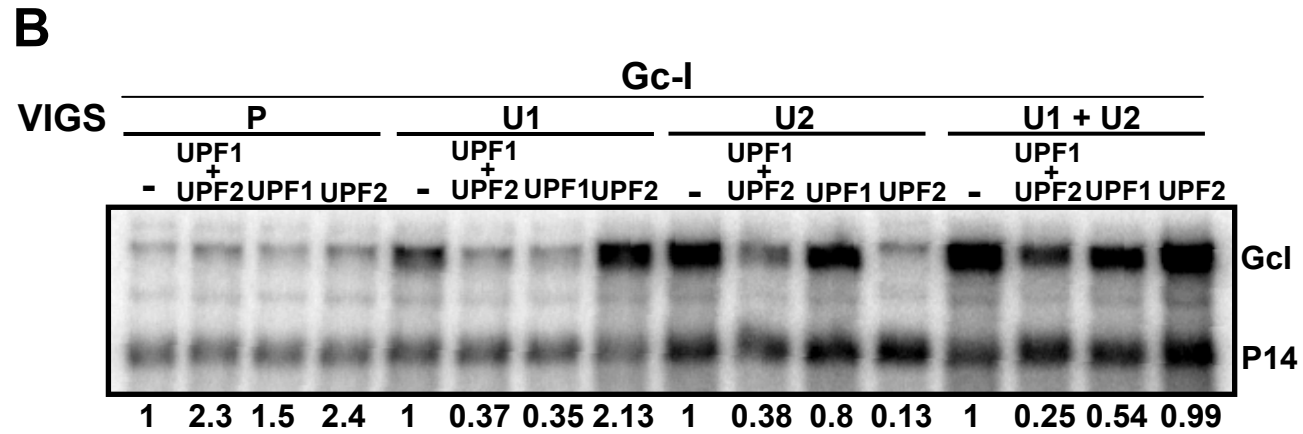

# Supplementary Figure 3

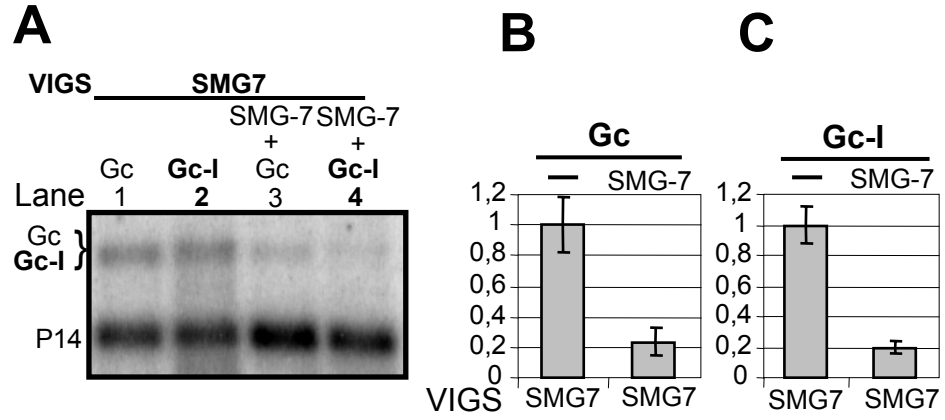

# Supplementary Figure 4

## A

| TAIR ID   | Coded protein                         | ALW   |    | 100 mM 3-AT |    | oNPG  |       | fragment/full (AA) |
|-----------|---------------------------------------|-------|----|-------------|----|-------|-------|--------------------|
|           |                                       | UPF 1 | BD | UPF 1       | BD | UPF 1 | BD    |                    |
| At2g39260 | UPF2                                  | +     | -  | +++         | -  | 88.23 | 2.29  | 439/1186           |
| At1g47860 | non-LTR retrotransposon family (LINE) | +     | -  | +++         | -  | 71.96 | 1.52  | 1557/1560          |
| At1g55340 | expressed unknown protein             | +     | -  | +           | -  | 44.90 | 1.45  | 205/205            |
| At2g27080 | harpin-induced protein-related        | +     | +  | ++          | -  | 41.86 | 10.72 | 135/260            |
| At2g36470 | expressed protein                     | +     | -  | -           | -  | 24.05 | 6.56  | 295/327            |
| At3g29575 | expressed protein                     | +     | +  | -           | -  | 22.54 | 8.90  | 231/231            |
| At4g21140 | expressed protein                     | +     | -  | -           | -  | 17.76 | 2.54  | 228/228            |
| At5g11090 | serine-rich protein-related           | +     | -  | -           | -  | 15.58 | 2.88  | 176/217            |
| At1g17620 | expressed protein                     | +     | -  | -           | -  | 14.73 | 3.22  | 107/264            |
| At3g23090 | expressed unknown protein             | +     | -  | -           | -  | 12.68 | 1.31  | 338/338            |
| At3g53540 | expressed protein                     | +     | -  | -           | -  | 12.05 | 1.55  | 862/924            |

## B

### UPF1 interactor candidates

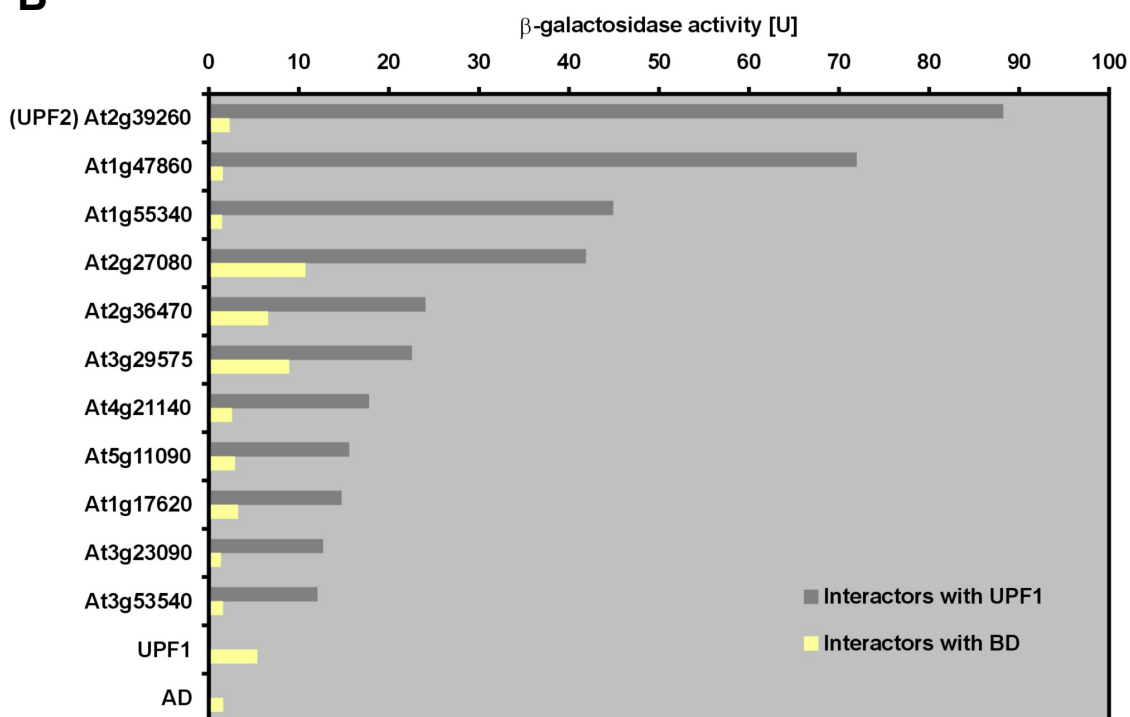

# Supplementary Figure 5

## A

SMG7 mRNA levels in different silenced plants

|                             |             |
|-----------------------------|-------------|
| <b>P-silenced</b>           | <b>1</b>    |
| <b>SMG7-silenced</b>        | <b>0.24</b> |
| <b>U1-silenced</b>          | <b>6.35</b> |
| <b>U2-silenced</b>          | <b>8.05</b> |
| <b>U3-silenced</b>          | <b>1.81</b> |
| <b>Mago-silenced</b>        | <b>1.17</b> |
| <b>Y14-silenced</b>         | <b>0.98</b> |
| <b>P-silenced<br/>+U1DN</b> | <b>2.2</b>  |

## B

**GFP  
+U1DN**

**GFP**

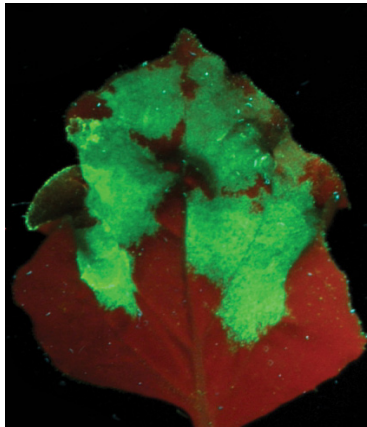

**G-smg7T  
+U1DN**

**G-smg7T**

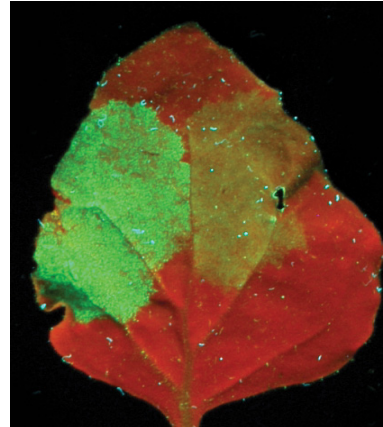



# Supplementary Figure 7

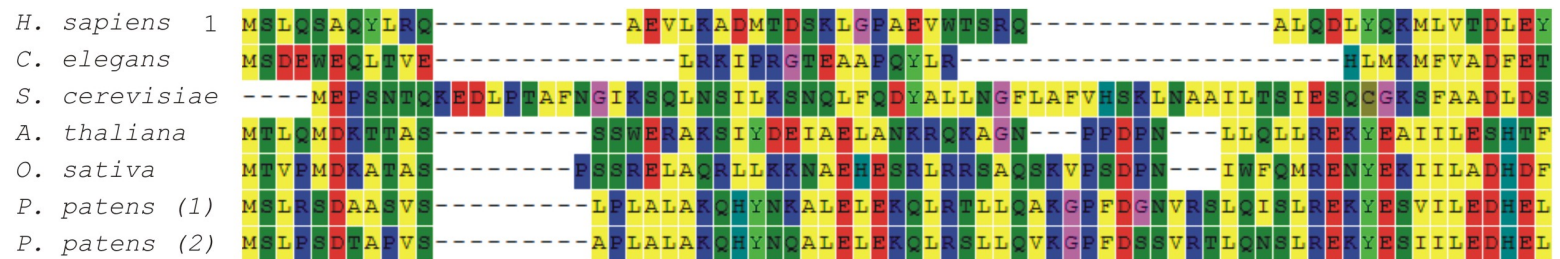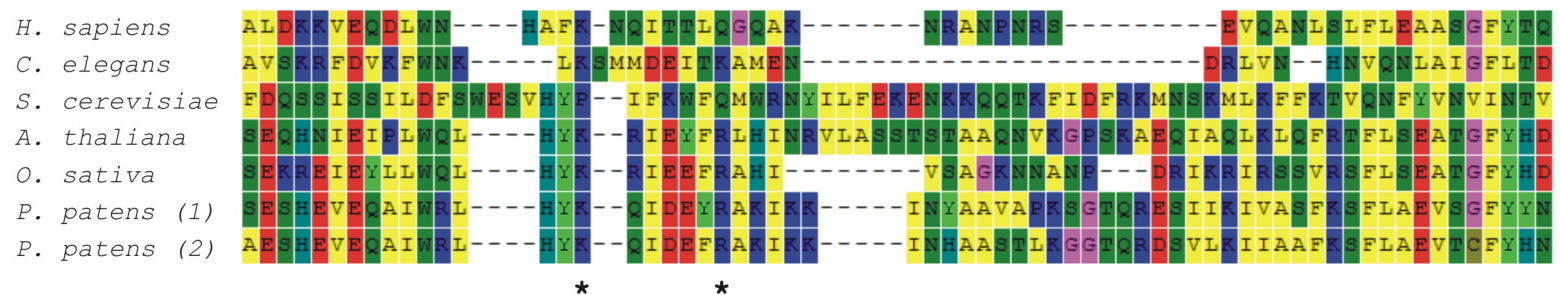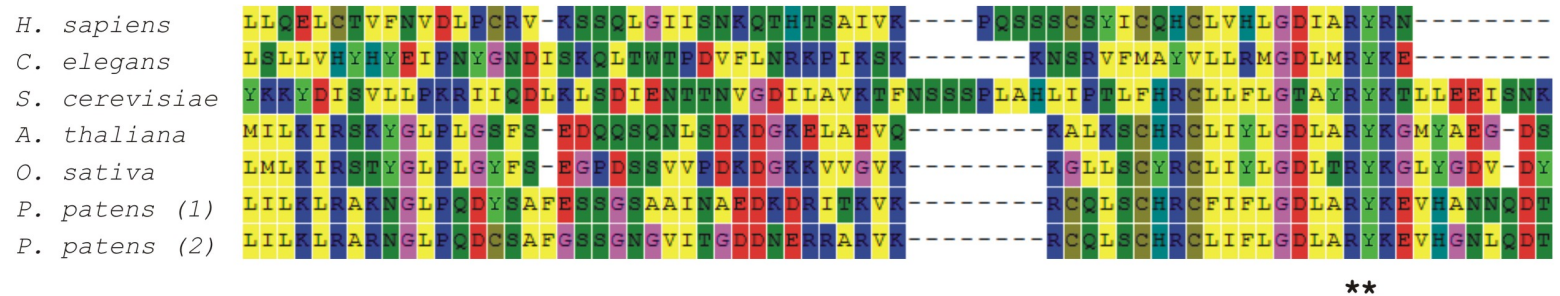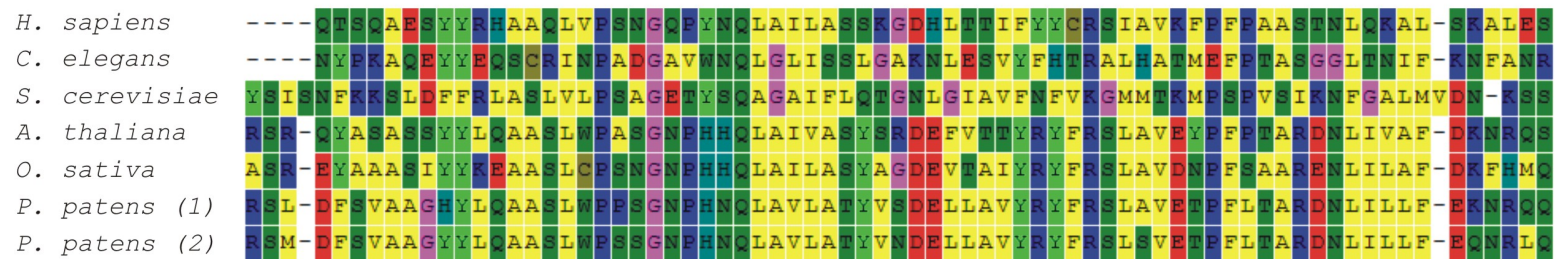

Supplement: emboj200888s2.pdf [file emboj200888s2.pdf]
